# Supplementary material
Source: PubMed Central journal article supplement (PMC6128408)
Supplement: NIHMS977254-supplement-1.pdf [file NIHMS977254-supplement-1.pdf]

**Supplementary Table 1.** Association of candidate polygenic scores with prevalent coronary artery disease

| Derivation Strategy     | Tuning Parameter                       | N Variants Available /<br>N Variants in Score (%) | OR per SD<br>(95% CI)   | AUC          |
|-------------------------|----------------------------------------|---------------------------------------------------|-------------------------|--------------|
| Genome-wide Significant | $p < 5 \times 10^{-8}$ and $r^2 < 0.2$ | 74/74 (100.0%)                                    | 1.39 (1.35-1.44)        | 0.791        |
| Pruning & Thresholding  | $p < 5 \times 10^{-8}$ and $r^2 < 0.4$ | 100/100 (100.0%)                                  | 1.39 (1.35-1.44)        | 0.791        |
| Pruning & Thresholding  | $p < 5 \times 10^{-8}$ and $r^2 < 0.6$ | 137/137 (100.0%)                                  | 1.39 (1.35-1.44)        | 0.790        |
| Pruning & Thresholding  | $p < 5 \times 10^{-8}$ and $r^2 < 0.8$ | 204/204 (100.0%)                                  | 1.37 (1.33-1.42)        | 0.789        |
| Pruning & Thresholding  | $p < 5 \times 10^{-6}$ and $r^2 < 0.2$ | 192/192 (100.0%)                                  | 1.46 (1.42-1.51)        | 0.794        |
| Pruning & Thresholding  | $p < 5 \times 10^{-6}$ and $r^2 < 0.4$ | 257/257 (100.0%)                                  | 1.47 (1.42-1.52)        | 0.794        |
| Pruning & Thresholding  | $p < 5 \times 10^{-6}$ and $r^2 < 0.6$ | 345/345 (100.0%)                                  | 1.45 (1.41-1.50)        | 0.793        |
| Pruning & Thresholding  | $p < 5 \times 10^{-6}$ and $r^2 < 0.8$ | 505/505 (100.0%)                                  | 1.43 (1.38-1.48)        | 0.792        |
| Pruning & Thresholding  | $p < 5 \times 10^{-4}$ and $r^2 < 0.2$ | 1269/1273 (99.7%)                                 | 1.53 (1.48-1.58)        | 0.797        |
| Pruning & Thresholding  | $p < 5 \times 10^{-4}$ and $r^2 < 0.4$ | 1590/1594 (99.7%)                                 | 1.56 (1.51-1.61)        | 0.798        |
| Pruning & Thresholding  | $p < 5 \times 10^{-4}$ and $r^2 < 0.6$ | 1997/2001 (99.8%)                                 | 1.55 (1.50-1.60)        | 0.797        |
| Pruning & Thresholding  | $p < 5 \times 10^{-4}$ and $r^2 < 0.8$ | 2706/2710 (99.9%)                                 | 1.53 (1.48-1.58)        | 0.797        |
| Pruning & Thresholding  | $p < 5 \times 10^{-2}$ and $r^2 < 0.2$ | 56941/57276 (99.4%)                               | 1.48 (1.44-1.53)        | 0.794        |
| Pruning & Thresholding  | $p < 5 \times 10^{-2}$ and $r^2 < 0.4$ | 70491/70831 (99.5%)                               | 1.54 (1.49-1.60)        | 0.797        |
| Pruning & Thresholding  | $p < 5 \times 10^{-2}$ and $r^2 < 0.6$ | 84921/85264 (99.6%)                               | 1.57 (1.52-1.63)        | 0.798        |
| Pruning & Thresholding  | $p < 5 \times 10^{-2}$ and $r^2 < 0.8$ | 105595/105942 (99.7%)                             | 1.59 (1.54-1.64)        | 0.799        |
| Pruning & Thresholding  | $p < 5 \times 10^{-1}$ and $r^2 < 0.2$ | 413921/417670 (99.1%)                             | 1.44 (1.39-1.49)        | 0.792        |
| Pruning & Thresholding  | $p < 5 \times 10^{-1}$ and $r^2 < 0.4$ | 590581/594406 (99.4%)                             | 1.48 (1.43-1.53)        | 0.794        |
| Pruning & Thresholding  | $p < 5 \times 10^{-1}$ and $r^2 < 0.6$ | 768415/772288 (99.5%)                             | 1.51 (1.46-1.56)        | 0.795        |
| Pruning & Thresholding  | $p < 5 \times 10^{-1}$ and $r^2 < 0.8$ | 996630/1000544 (99.6%)                            | 1.53 (1.48-1.58)        | 0.796        |
| Pruning & Thresholding  | $p < 1$ and $r^2 < 0.2$                | 634268/641894 (98.8%)                             | 1.44 (1.39-1.48)        | 0.792        |
| Pruning & Thresholding  | $p < 1$ and $r^2 < 0.4$                | 973234/981023 (99.2%)                             | 1.48 (1.43-1.52)        | 0.794        |
| Pruning & Thresholding  | $p < 1$ and $r^2 < 0.6$                | 1349381/1357303 (99.4%)                           | 1.50 (1.46-1.55)        | 0.795        |
| Pruning & Thresholding  | $p < 1$ and $r^2 < 0.8$                | 1848045/1856048 (99.6%)                           | 1.52 (1.47-1.57)        | 0.796        |
| LDPred Algorithm        | $\rho = 1$                             | 6629369/6630150 (>99.9%)                          | 1.52 (1.47-1.58)        | 0.796        |
| LDPred Algorithm        | $\rho = 0.3$                           | 6629369/6630150 (>99.9%)                          | 1.53 (1.48-1.58)        | 0.796        |
| LDPred Algorithm        | $\rho = 0.1$                           | 6629369/6630150 (>99.9%)                          | 1.54 (1.49-1.59)        | 0.796        |
| LDPred Algorithm        | $\rho = 0.03$                          | 6629369/6630150 (>99.9%)                          | 1.57 (1.52-1.62)        | 0.798        |
| LDPred Algorithm        | $\rho = 0.01$                          | 6629369/6630150 (>99.9%)                          | 1.62 (1.57-1.68)        | 0.801        |
| LDPred Algorithm        | $\rho = 0.003$                         | 6629369/6630150 (>99.9%)                          | 1.69 (1.63-1.75)        | 0.805        |
| <b>LDPred Algorithm</b> | <b><math>\rho = 0.001</math></b>       | <b>6629369/6630150 (&gt;99.9%)</b>                | <b>1.72 (1.67-1.78)</b> | <b>0.806</b> |

Odds ratio (OR) per standard deviation (SD) and area under the receiver-operator curve (AUC) were calculated using logistic regression in a validation dataset of 120,280 participants in the UK Biobank (adjusted for age, sex, the first four principal components of ancestry and genotyping array) of which 3,963 had been diagnosed with having coronary artery disease.

$p$  –  $p$ -value in discovery GWAS study;  $r^2$  – linkage disequilibrium pruning threshold;  $\rho$  – tuning parameter to model the proportion of variants assumed to be causal; OR per SD – odds ratio per standard deviation increment; AUC – area under the receiver operator curve.

**Supplementary Table 2.** Association of candidate polygenic scores with prevalent atrial fibrillation

| Derivation Strategy     | Tuning Parameter                       | N Variants Available /<br>N Variants in Score (%) | OR per SD<br>(95% CI)   | AUC          |
|-------------------------|----------------------------------------|---------------------------------------------------|-------------------------|--------------|
| Genome-wide Significant | $p < 5 \times 10^{-8}$ and $r^2 < 0.2$ | 55/55 (100.0%)                                    | 1.48 (1.43-1.54)        | 0.766        |
| Pruning & Thresholding  | $p < 5 \times 10^{-8}$ and $r^2 < 0.4$ | 78/78 (100.0%)                                    | 1.52 (1.46-1.58)        | 0.768        |
| Pruning & Thresholding  | $p < 5 \times 10^{-8}$ and $r^2 < 0.6$ | 106/106 (100.0%)                                  | 1.53 (1.47-1.60)        | 0.768        |
| Pruning & Thresholding  | $p < 5 \times 10^{-8}$ and $r^2 < 0.8$ | 149/149 (100.0%)                                  | 1.55 (1.49-1.62)        | 0.768        |
| Pruning & Thresholding  | $p < 5 \times 10^{-6}$ and $r^2 < 0.2$ | 161/161 (100.0%)                                  | 1.51 (1.45-1.58)        | 0.767        |
| Pruning & Thresholding  | $p < 5 \times 10^{-6}$ and $r^2 < 0.4$ | 218/218 (100.0%)                                  | 1.56 (1.50-1.62)        | 0.769        |
| Pruning & Thresholding  | $p < 5 \times 10^{-6}$ and $r^2 < 0.6$ | 288/288 (100.0%)                                  | 1.58 (1.51-1.64)        | 0.770        |
| Pruning & Thresholding  | $p < 5 \times 10^{-6}$ and $r^2 < 0.8$ | 383/383 (100.0%)                                  | 1.60 (1.53-1.67)        | 0.770        |
| Pruning & Thresholding  | $p < 5 \times 10^{-4}$ and $r^2 < 0.2$ | 2304/2327 (99.0%)                                 | 1.35 (1.29-1.41)        | 0.754        |
| Pruning & Thresholding  | $p < 5 \times 10^{-4}$ and $r^2 < 0.4$ | 2558/2580 (99.1%)                                 | 1.45 (1.38-1.51)        | 0.759        |
| Pruning & Thresholding  | $p < 5 \times 10^{-4}$ and $r^2 < 0.6$ | 2919/2941 (99.3%)                                 | 1.51 (1.44-1.58)        | 0.763        |
| Pruning & Thresholding  | $p < 5 \times 10^{-4}$ and $r^2 < 0.8$ | 3445/3474 (99.2%)                                 | 1.54 (1.47-1.61)        | 0.765        |
| Pruning & Thresholding  | $p < 5 \times 10^{-2}$ and $r^2 < 0.2$ | 122196/123113 (99.3%)                             | 1.20 (1.15-1.26)        | 0.748        |
| Pruning & Thresholding  | $p < 5 \times 10^{-2}$ and $r^2 < 0.4$ | 138395/139383 (99.3%)                             | 1.26 (1.20-1.31)        | 0.750        |
| Pruning & Thresholding  | $p < 5 \times 10^{-2}$ and $r^2 < 0.6$ | 156473/157515 (99.3%)                             | 1.31 (1.25-1.37)        | 0.753        |
| Pruning & Thresholding  | $p < 5 \times 10^{-2}$ and $r^2 < 0.8$ | 180571/181743 (99.4%)                             | 1.33 (1.27-1.39)        | 0.754        |
| Pruning & Thresholding  | $p < 5 \times 10^{-1}$ and $r^2 < 0.2$ | 872572/880291 (99.1%)                             | 1.18 (1.13-1.23)        | 0.747        |
| Pruning & Thresholding  | $p < 5 \times 10^{-1}$ and $r^2 < 0.4$ | 1067307/1075829 (99.2%)                           | 1.23 (1.17-1.28)        | 0.749        |
| Pruning & Thresholding  | $p < 5 \times 10^{-1}$ and $r^2 < 0.6$ | 1272661/1282064 (99.3%)                           | 1.26 (1.21-1.32)        | 0.750        |
| Pruning & Thresholding  | $p < 5 \times 10^{-1}$ and $r^2 < 0.8$ | 1522420/1532899 (99.3%)                           | 1.28 (1.22-1.33)        | 0.751        |
| Pruning & Thresholding  | $p < 1$ and $r^2 < 0.2$                | 1491900/1506103 (99.1%)                           | 1.17 (1.12-1.23)        | 0.747        |
| Pruning & Thresholding  | $p < 1$ and $r^2 < 0.4$                | 1842010/1857685 (99.2%)                           | 1.22 (1.17-1.28)        | 0.749        |
| Pruning & Thresholding  | $p < 1$ and $r^2 < 0.6$                | 2246065/2263436 (99.2%)                           | 1.26 (1.20-1.32)        | 0.750        |
| Pruning & Thresholding  | $p < 1$ and $r^2 < 0.8$                | 2765175/2784693 (99.3%)                           | 1.27 (1.22-1.33)        | 0.751        |
| LDPred Algorithm        | $\rho = 1$                             | 6705798/6730541 (99.6%)                           | 1.33 (1.27-1.39)        | 0.754        |
| LDPred Algorithm        | $\rho = 0.3$                           | 6705798/6730541 (99.6%)                           | 1.34 (1.28-1.40)        | 0.755        |
| LDPred Algorithm        | $\rho = 0.1$                           | 6705798/6730541 (99.6%)                           | 1.39 (1.32-1.45)        | 0.757        |
| LDPred Algorithm        | $\rho = 0.03$                          | 6705798/6730541 (99.6%)                           | 1.45 (1.39-1.51)        | 0.761        |
| LDPred Algorithm        | $\rho = 0.01$                          | 6705798/6730541 (99.6%)                           | 1.53 (1.47-1.60)        | 0.767        |
| <b>LDPred Algorithm</b> | <b><math>\rho = 0.003</math></b>       | <b>6705798/6730541 (99.6%)</b>                    | <b>1.63 (1.56-1.70)</b> | <b>0.773</b> |
| LDPred Algorithm*       | $\rho = 0.001$                         | 6705798/6730541 (99.6%)                           | 1.04 (0.99-1.08)        | 0.743        |

\*LDPred Algorithm failed to converge

Odds ratio (OR) per standard deviation (SD) and area under the receiver operator curve (AUC) were calculated using logistic regression in a validation dataset of 120,280 participants in the UK Biobank (adjusted for age, sex, the first four principal components of ancestry and genotyping array) of which 2,024 had been diagnosed with atrial fibrillation.

$p$  –  $p$ -value in discovery GWAS study;  $r^2$  – linkage disequilibrium pruning threshold;  $\rho$  – tuning parameter to model the proportion of variants assumed to be causal; OR per SD – odds ratio per standard deviation increment; AUC – area under the receiver-operator curve.

**Supplementary Table 3.** Association of candidate polygenic scores with prevalent type 2 diabetes

| Derivation Strategy     | Tuning Parameter                       | N Variants Available /<br>N Variants in Score (%) | OR per SD<br>(95% CI)   | AUC          |
|-------------------------|----------------------------------------|---------------------------------------------------|-------------------------|--------------|
| Genome-wide Significant | $p < 5 \times 10^{-8}$ and $r^2 < 0.2$ | 72/72 (100.0%)                                    | 1.34 (1.30-1.39)        | 0.700        |
| Pruning & Thresholding  | $p < 5 \times 10^{-8}$ and $r^2 < 0.4$ | 98/98 (100.0%)                                    | 1.33 (1.28-1.38)        | 0.698        |
| Pruning & Thresholding  | $p < 5 \times 10^{-8}$ and $r^2 < 0.6$ | 133/133 (100.0%)                                  | 1.31 (1.26-1.36)        | 0.697        |
| Pruning & Thresholding  | $p < 5 \times 10^{-8}$ and $r^2 < 0.8$ | 201/201 (100.0%)                                  | 1.29 (1.25-1.34)        | 0.695        |
| Pruning & Thresholding  | $p < 5 \times 10^{-6}$ and $r^2 < 0.2$ | 209/209 (100.0%)                                  | 1.40 (1.35-1.46)        | 0.704        |
| Pruning & Thresholding  | $p < 5 \times 10^{-6}$ and $r^2 < 0.4$ | 274/274 (100.0%)                                  | 1.40 (1.34-1.45)        | 0.703        |
| Pruning & Thresholding  | $p < 5 \times 10^{-6}$ and $r^2 < 0.6$ | 388/388 (100.0%)                                  | 1.37 (1.32-1.42)        | 0.701        |
| Pruning & Thresholding  | $p < 5 \times 10^{-6}$ and $r^2 < 0.8$ | 550/551 (99.8%)                                   | 1.36 (1.31-1.41)        | 0.700        |
| Pruning & Thresholding  | $p < 5 \times 10^{-4}$ and $r^2 < 0.2$ | 2838/2913 (97.4%)                                 | 1.36 (1.31-1.41)        | 0.701        |
| Pruning & Thresholding  | $p < 5 \times 10^{-4}$ and $r^2 < 0.4$ | 3269/3346 (97.7%)                                 | 1.40 (1.34-1.45)        | 0.704        |
| Pruning & Thresholding  | $p < 5 \times 10^{-4}$ and $r^2 < 0.6$ | 3858/3937 (98.0%)                                 | 1.43 (1.37-1.48)        | 0.706        |
| Pruning & Thresholding  | $p < 5 \times 10^{-4}$ and $r^2 < 0.8$ | 4832/4912 (98.4%)                                 | 1.43 (1.37-1.48)        | 0.705        |
| Pruning & Thresholding  | $p < 5 \times 10^{-2}$ and $r^2 < 0.2$ | 145622/151854 (95.9%)                             | 1.37 (1.32-1.42)        | 0.701        |
| Pruning & Thresholding  | $p < 5 \times 10^{-2}$ and $r^2 < 0.4$ | 169289/175728 (96.3%)                             | 1.43 (1.38-1.49)        | 0.705        |
| Pruning & Thresholding  | $p < 5 \times 10^{-2}$ and $r^2 < 0.6$ | 193703/200323 (96.7%)                             | 1.48 (1.42-1.53)        | 0.708        |
| Pruning & Thresholding  | $p < 5 \times 10^{-2}$ and $r^2 < 0.8$ | 226545/233313 (97.1%)                             | 1.47 (1.41-1.53)        | 0.707        |
| Pruning & Thresholding  | $p < 5 \times 10^{-1}$ and $r^2 < 0.2$ | 1049001/1107833 (94.7%)                           | 1.32 (1.27-1.37)        | 0.697        |
| Pruning & Thresholding  | $p < 5 \times 10^{-1}$ and $r^2 < 0.4$ | 1353005/1414886 (95.6%)                           | 1.38 (1.33-1.44)        | 0.701        |
| Pruning & Thresholding  | $p < 5 \times 10^{-1}$ and $r^2 < 0.6$ | 1634296/1698631 (96.2%)                           | 1.42 (1.37-1.48)        | 0.704        |
| Pruning & Thresholding  | $p < 5 \times 10^{-1}$ and $r^2 < 0.8$ | 1959214/2025081 (96.7%)                           | 1.45 (1.39-1.50)        | 0.705        |
| Pruning & Thresholding  | $p < 1$ and $r^2 < 0.2$                | 1682488/1794860 (93.7%)                           | 1.31 (1.26-1.36)        | 0.696        |
| Pruning & Thresholding  | $p < 1$ and $r^2 < 0.4$                | 2280565/2399906 (95.0%)                           | 1.37 (1.32-1.42)        | 0.700        |
| Pruning & Thresholding  | $p < 1$ and $r^2 < 0.6$                | 2881225/3006278 (95.8%)                           | 1.42 (1.36-1.47)        | 0.703        |
| Pruning & Thresholding  | $p < 1$ and $r^2 < 0.8$                | 3575137/3703499 (96.5%)                           | 1.44 (1.39-1.50)        | 0.706        |
| LDPred Algorithm        | $\rho = 1$                             | 6893037/6917436 (99.6%)                           | 1.52 (1.47-1.58)        | 0.714        |
| LDPred Algorithm        | $\rho = 0.3$                           | 6893037/6917436 (99.6%)                           | 1.53 (1.47-1.59)        | 0.714        |
| LDPred Algorithm        | $\rho = 0.1$                           | 6893037/6917436 (99.6%)                           | 1.55 (1.49-1.61)        | 0.716        |
| LDPred Algorithm        | $\rho = 0.03$                          | 6893037/6917436 (99.6%)                           | 1.59 (1.53-1.65)        | 0.720        |
| <b>LDPred Algorithm</b> | <b><math>\rho = 0.01</math></b>        | <b>6893037/6917436 (99.6%)</b>                    | <b>1.65 (1.59-1.71)</b> | <b>0.725</b> |
| LDPred Algorithm        | $\rho = 0.003$                         | 6893037/6917436 (99.6%)                           | 1.15 (1.11-1.20)        | 0.687        |
| LDPred Algorithm*       | $\rho = 0.001$                         | 6893037/6917436 (99.6%)                           | 1.05 (1.02-1.10)        | 0.683        |

\*LDPred Algorithm failed to converge

Odds ratio (OR) per standard deviation (SD) and area under the receiver-operator curve (AUC) were calculated using logistic regression in a validation dataset of 120,280 participants in the UK Biobank (adjusted for age, sex, the first four principal components of ancestry and genotyping array) of which 2,785 had been diagnosed with type 2 diabetes.

$p$  – p-value in discovery GWAS study;  $r^2$  – linkage disequilibrium pruning threshold;  $\rho$  – tuning parameter to model the proportion of variants assumed to be causal. OR per SD – odds ratio per standard deviation increment; AUC – area under the receiver-operator curve.

**Supplementary Table 4.** Association of candidate polygenic scores with prevalent inflammatory bowel disease

| Derivation Strategy     | Tuning Parameter                       | N Variants Available /<br>N Variants in Score (%) | OR per SD<br>(95% CI)   | AUC          |
|-------------------------|----------------------------------------|---------------------------------------------------|-------------------------|--------------|
| Genome-wide Significant | $p < 5 \times 10^{-8}$ and $r^2 < 0.2$ | 288/292 (98.6%)                                   | 1.40 (1.34-1.47)        | 0.614        |
| Pruning & Thresholding  | $p < 5 \times 10^{-8}$ and $r^2 < 0.4$ | 475/484 (98.1%)                                   | 1.31 (1.24-1.38)        | 0.582        |
| Pruning & Thresholding  | $p < 5 \times 10^{-8}$ and $r^2 < 0.6$ | 800/812 (98.5%)                                   | 1.23 (1.17-1.30)        | 0.567        |
| Pruning & Thresholding  | $p < 5 \times 10^{-8}$ and $r^2 < 0.8$ | 1529/1545 (99.0%)                                 | 1.18 (1.11-1.24)        | 0.557        |
| Pruning & Thresholding  | $p < 5 \times 10^{-6}$ and $r^2 < 0.2$ | 520/533 (97.6%)                                   | 1.43 (1.37-1.50)        | 0.625        |
| Pruning & Thresholding  | $p < 5 \times 10^{-6}$ and $r^2 < 0.4$ | 857/875 (97.9%)                                   | 1.36 (1.29-1.43)        | 0.591        |
| Pruning & Thresholding  | $p < 5 \times 10^{-6}$ and $r^2 < 0.6$ | 1334/1356 (98.4%)                                 | 1.26 (1.19-1.33)        | 0.572        |
| Pruning & Thresholding  | $p < 5 \times 10^{-6}$ and $r^2 < 0.8$ | 2391/2418 (98.9%)                                 | 1.19 (1.13-1.26)        | 0.560        |
| Pruning & Thresholding  | $p < 5 \times 10^{-4}$ and $r^2 < 0.2$ | 2979/3028 (98.4%)                                 | 1.54 (1.46-1.62)        | 0.631        |
| Pruning & Thresholding  | $p < 5 \times 10^{-4}$ and $r^2 < 0.4$ | 3817/3875 (98.5%)                                 | 1.45 (1.38-1.53)        | 0.610        |
| Pruning & Thresholding  | $p < 5 \times 10^{-4}$ and $r^2 < 0.6$ | 4949/5013 (98.7%)                                 | 1.34 (1.27-1.42)        | 0.587        |
| Pruning & Thresholding  | $p < 5 \times 10^{-4}$ and $r^2 < 0.8$ | 7111/7185 (99.0%)                                 | 1.24 (1.17-1.30)        | 0.569        |
| Pruning & Thresholding  | $p < 5 \times 10^{-2}$ and $r^2 < 0.2$ | 118775/121914 (97.4%)                             | 1.53 (1.44-1.61)        | 0.616        |
| Pruning & Thresholding  | $p < 5 \times 10^{-2}$ and $r^2 < 0.4$ | 140825/144087 (97.7%)                             | 1.58 (1.50-1.67)        | 0.629        |
| Pruning & Thresholding  | $p < 5 \times 10^{-2}$ and $r^2 < 0.6$ | 163967/167349 (98.0%)                             | 1.54 (1.46-1.63)        | 0.623        |
| Pruning & Thresholding  | $p < 5 \times 10^{-2}$ and $r^2 < 0.8$ | 195815/199334 (98.2%)                             | 1.39 (1.31-1.46)        | 0.597        |
| Pruning & Thresholding  | $p < 5 \times 10^{-1}$ and $r^2 < 0.2$ | 812741/842603 (96.5%)                             | 1.46 (1.37-1.55)        | 0.598        |
| Pruning & Thresholding  | $p < 5 \times 10^{-1}$ and $r^2 < 0.4$ | 1066545/1098071 (97.1%)                           | 1.50 (1.42-1.59)        | 0.608        |
| Pruning & Thresholding  | $p < 5 \times 10^{-1}$ and $r^2 < 0.6$ | 1308728/1341631 (97.5%)                           | 1.53 (1.44-1.61)        | 0.616        |
| Pruning & Thresholding  | $p < 5 \times 10^{-1}$ and $r^2 < 0.8$ | 1602425/1636580 (97.9%)                           | 1.46 (1.39-1.55)        | 0.610        |
| Pruning & Thresholding  | $p < 1$ and $r^2 < 0.2$                | 1291770/1349599 (95.7%)                           | 1.45 (1.36-1.54)        | 0.597        |
| Pruning & Thresholding  | $p < 1$ and $r^2 < 0.4$                | 1783031/1844513 (96.7%)                           | 1.49 (1.41-1.58)        | 0.607        |
| Pruning & Thresholding  | $p < 1$ and $r^2 < 0.6$                | 2291513/2356075 (97.3%)                           | 1.52 (1.44-1.61)        | 0.615        |
| Pruning & Thresholding  | $p < 1$ and $r^2 < 0.8$                | 2917090/2984351 (97.7%)                           | 1.47 (1.39-1.55)        | 0.610        |
| LDPred Algorithm        | $\rho = 1$                             | 6882324/6907112 (99.6%)                           | 1.58 (1.49-1.66)        | 0.628        |
| LDPred Algorithm        | $\rho = 0.3$                           | 6882324/6907112 (99.6%)                           | 1.58 (1.50-1.67)        | 0.629        |
| <b>LDPred Algorithm</b> | <b><math>\rho = 0.1</math></b>         | <b>6882324/6907112 (99.6%)</b>                    | <b>1.61 (1.52-1.70)</b> | <b>0.633</b> |
| LDPred Algorithm        | $\rho = 0.03$                          | 6882324/6907112 (99.6%)                           | 1.55 (1.47-1.64)        | 0.625        |
| LDPred Algorithm        | $\rho = 0.01$                          | 6882324/6907112 (99.6%)                           | 1.28 (1.22-1.35)        | 0.580        |
| LDPred Algorithm*       | $\rho = 0.003$                         | 6882324/6907112 (99.6%)                           | 1.21 (1.15-1.27)        | 0.563        |
| LDPred Algorithm*       | $\rho = 0.001$                         | 6882324/6907112 (99.6%)                           | 1.16 (1.10-1.23)        | 0.556        |

\*LDPred Algorithm failed to converge

Odds ratio (OR) per standard deviation (SD) and area under the receiver-operator curve (AUC) were calculated using logistic regression in a validation dataset of 120,280 participants in the UK Biobank (adjusted for age, sex, the first four principal components of ancestry and genotyping array) of which 1,360 had been diagnosed with inflammatory bowel disease.

$p$  –  $p$ -value in discovery GWAS study;  $r^2$  – linkage disequilibrium pruning threshold;  $\rho$  – tuning parameter to model the proportion of variants assumed to be causal; OR per SD – odds ratio per standard deviation increment; AUC – area under the receiver-operator curve.

**Supplementary Table 5.** Association of candidate polygenic scores with prevalent breast cancer

| Derivation Strategy               | Tuning Parameter                                                          | N Variants Available / N Variants in Score (%) | OR per SD (95% CI)      | AUC          |
|-----------------------------------|---------------------------------------------------------------------------|------------------------------------------------|-------------------------|--------------|
| Genome-wide Significant           | $p < 5 \times 10^{-8}$ and $r^2 < 0.2$                                    | 572/577 (99.1%)                                | 1.47 (1.42-1.53)        | 0.677        |
| Pruning & Thresholding            | $p < 5 \times 10^{-8}$ and $r^2 < 0.4$                                    | 878/884 (99.3%)                                | 1.44 (1.39-1.50)        | 0.673        |
| Pruning & Thresholding            | $p < 5 \times 10^{-8}$ and $r^2 < 0.6$                                    | 1284/1292 (99.4%)                              | 1.39 (1.34-1.45)        | 0.666        |
| Pruning & Thresholding            | $p < 5 \times 10^{-8}$ and $r^2 < 0.8$                                    | 1959/1971 (99.4%)                              | 1.39 (1.33-1.45)        | 0.666        |
| Pruning & Thresholding            | $p < 5 \times 10^{-6}$ and $r^2 < 0.2$                                    | 1151/1165 (98.8%)                              | 1.51 (1.45-1.57)        | 0.681        |
| Pruning & Thresholding            | $p < 5 \times 10^{-6}$ and $r^2 < 0.4$                                    | 1692/1712 (98.8%)                              | 1.48 (1.42-1.54)        | 0.677        |
| Pruning & Thresholding            | $p < 5 \times 10^{-6}$ and $r^2 < 0.6$                                    | 2382/2411 (98.8%)                              | 1.43 (1.38-1.49)        | 0.671        |
| Pruning & Thresholding            | $p < 5 \times 10^{-6}$ and $r^2 < 0.8$                                    | 3588/3624 (99.0%)                              | 1.43 (1.37-1.49)        | 0.671        |
| <b>Pruning &amp; Thresholding</b> | <b><math>p &lt; 5 \times 10^{-4}</math> and <math>r^2 &lt; 0.2</math></b> | <b>5158/5218 (98.9%)</b>                       | <b>1.56 (1.49-1.62)</b> | <b>0.685</b> |
| Pruning & Thresholding            | $p < 5 \times 10^{-4}$ and $r^2 < 0.4$                                    | 6868/6942 (98.9%)                              | 1.55 (1.49-1.61)        | 0.684        |
| Pruning & Thresholding            | $p < 5 \times 10^{-4}$ and $r^2 < 0.6$                                    | 8945/9036 (99.0%)                              | 1.51 (1.45-1.57)        | 0.679        |
| Pruning & Thresholding            | $p < 5 \times 10^{-4}$ and $r^2 < 0.8$                                    | 12352/12461 (99.1%)                            | 1.50 (1.44-1.56)        | 0.678        |
| Pruning & Thresholding            | $p < 5 \times 10^{-2}$ and $r^2 < 0.2$                                    | 114421/115503 (99.1%)                          | 1.45 (1.39-1.50)        | 0.672        |
| Pruning & Thresholding            | $p < 5 \times 10^{-2}$ and $r^2 < 0.4$                                    | 143235/144508 (99.1%)                          | 1.49 (1.43-1.55)        | 0.677        |
| Pruning & Thresholding            | $p < 5 \times 10^{-2}$ and $r^2 < 0.6$                                    | 173750/175238 (99.2%)                          | 1.50 (1.44-1.56)        | 0.678        |
| Pruning & Thresholding            | $p < 5 \times 10^{-2}$ and $r^2 < 0.8$                                    | 217554/219334 (99.2%)                          | 1.51 (1.45-1.57)        | 0.678        |
| Pruning & Thresholding            | $p < 5 \times 10^{-1}$ and $r^2 < 0.2$                                    | 657758/663879 (99.1%)                          | 1.38 (1.33-1.44)        | 0.665        |
| Pruning & Thresholding            | $p < 5 \times 10^{-1}$ and $r^2 < 0.4$                                    | 910344/918115 (99.2%)                          | 1.41 (1.36-1.47)        | 0.668        |
| Pruning & Thresholding            | $p < 5 \times 10^{-1}$ and $r^2 < 0.6$                                    | 1157487/1166909 (99.2%)                        | 1.43 (1.38-1.49)        | 0.670        |
| Pruning & Thresholding            | $p < 5 \times 10^{-1}$ and $r^2 < 0.8$                                    | 1471670/1483324 (99.2%)                        | 1.45 (1.39-1.51)        | 0.671        |
| Pruning & Thresholding            | $p < 1$ and $r^2 < 0.2$                                                   | 997491/1007125 (99.0%)                         | 1.38 (1.32-1.43)        | 0.664        |
| Pruning & Thresholding            | $p < 1$ and $r^2 < 0.4$                                                   | 1469656/1482406 (99.1%)                        | 1.41 (1.35-1.47)        | 0.668        |
| Pruning & Thresholding            | $p < 1$ and $r^2 < 0.6$                                                   | 1968975/1984988 (99.2%)                        | 1.43 (1.37-1.49)        | 0.669        |
| Pruning & Thresholding            | $p < 1$ and $r^2 < 0.8$                                                   | 2612769/2633156 (99.2%)                        | 1.44 (1.38-1.50)        | 0.670        |
| LDPred Algorithm                  | $\rho = 1$                                                                | 7227160/7261712 (99.5%)                        | 1.47 (1.41-1.53)        | 0.674        |
| LDPred Algorithm                  | $\rho = 0.3$                                                              | 7227160/7261712 (99.5%)                        | 1.51 (1.45-1.57)        | 0.678        |
| LDPred Algorithm                  | $\rho = 0.1$                                                              | 7227160/7261712 (99.5%)                        | 1.52 (1.46-1.59)        | 0.679        |
| LDPred Algorithm                  | $\rho = 0.03$                                                             | 7227160/7261712 (99.5%)                        | 1.30 (1.25-1.35)        | 0.657        |
| LDPred Algorithm*                 | $\rho = 0.01$                                                             | 7227160/7261712 (99.5%)                        | 1.18 (1.14-1.23)        | 0.646        |
| LDPred Algorithm*                 | $\rho = 0.003$                                                            | 7227160/7261712 (99.5%)                        | 1.12 (1.08-1.17)        | 0.642        |
| LDPred Algorithm*                 | $\rho = 0.001$                                                            | 7227160/7261712 (99.5%)                        | 1.13 (1.08-1.17)        | 0.642        |

\*LDPred Algorithm failed to converge

Odds ratio (OR) per standard deviation (SD) and area under the curve (AUC) were calculated using logistic regression in a validation dataset of 63,347 female participants in the UK Biobank (adjusted for age, the first four principal components of ancestry and genotyping array) of which 2,576 had been diagnosed with having breast cancer.

$p$  – p-value in discovery GWAS study;  $r^2$  – linkage disequilibrium pruning threshold;  $\rho$  – tuning parameter to model the proportion of variants assumed to be causal; OR per SD – odds ratio per standard deviation increment; AUC – area under the receiver-operator curve.

**Supplementary Table 6.** Genome-wide polygenic score characteristics for five diseases across derivation strategies.

For each disease, characteristics of genome-wide polygenic scores (GPSs) are displayed according to derivation strategy of GWAS significant variants only (pruning and thresholding with  $p < 5 \times 10^{-8}$  and  $r^2 < 0.2$ ), the best of the remaining 23 pruning and thresholding GPSs, and the best of 7 LDpred GPSs. The score with the highest area under the receiver-operator curve (denoted by bolded font) was carried forward to the testing dataset.

| Disease                           | Derivation strategy             | N variants available / N variants in score (%)  | Tuning parameters                                                      | AUC (95%CI)                            |
|-----------------------------------|---------------------------------|-------------------------------------------------|------------------------------------------------------------------------|----------------------------------------|
| Coronary artery disease           | GWAS significant variants       | 74 / 74<br>(100%)                               | $p < 5 \times 10^{-8}$ , $r^2 < 0.2$                                   | 0.791<br>(0.785 – 0.798)               |
| Coronary artery disease           | Pruning and thresholding        | 105,942 / 105,595<br>(99.67%)                   | $p < 0.05$ , $r^2 < 0.8$                                               | 0.799<br>(0.793 – 0.806)               |
| <b>Coronary artery disease</b>    | <b>LDpred</b>                   | <b>6,629,369 / 6,630,150</b><br><b>(99.99%)</b> | <b><math>\rho = 0.001</math></b>                                       | <b>0.806</b><br><b>(0.800 – 0.813)</b> |
| Atrial fibrillation               | GWAS significant variants       | 55 / 55<br>(100%)                               | $p < 5 \times 10^{-8}$ , $r^2 < 0.2$                                   | 0.766<br>(0.757 – 0.776)               |
| Atrial fibrillation               | Pruning and thresholding        | 383 / 383<br>(100%)                             | $p < 5 \times 10^{-6}$ , $r^2 < 0.8$                                   | 0.770<br>(0.760 – 0.780)               |
| <b>Atrial fibrillation</b>        | <b>LDpred</b>                   | <b>6,705,798 / 6,730,541</b><br><b>(99.63%)</b> | <b><math>\rho = 0.003</math></b>                                       | <b>0.773</b><br><b>(0.763 – 0.782)</b> |
| Type 2 diabetes                   | GWAS significant variants       | 72 / 72<br>(100%)                               | $p < 5 \times 10^{-8}$ , $r^2 < 0.2$                                   | 0.700<br>(0.690 – 0.709)               |
| Type 2 diabetes                   | Pruning and thresholding        | 193,703 / 200,323<br>(96.7%)                    | $p < 0.05$ , $r^2 < 0.6$                                               | 0.708<br>(0.699 – 0.717)               |
| <b>Type 2 diabetes</b>            | <b>LDpred</b>                   | <b>6,893,037 / 6,917,436</b><br><b>(99.65%)</b> | <b><math>\rho = 0.01</math></b>                                        | <b>0.725</b><br><b>(0.716 – 0.734)</b> |
| Inflammatory bowel disease        | GWAS significant variants       | 288 / 292<br>(98.6%)                            | $p < 5 \times 10^{-8}$ , $r^2 < 0.2$                                   | 0.614<br>(0.600 – 0.629)               |
| Inflammatory bowel disease        | Pruning and thresholding        | 2979 / 3028<br>(98.4%)                          | $p < 5 \times 10^{-4}$ , $r^2 < 0.2$                                   | 0.631<br>(0.619 – 0.645)               |
| <b>Inflammatory bowel disease</b> | <b>LDpred</b>                   | <b>6,882,324 / 6,907,112</b><br><b>(99.64%)</b> | <b><math>\rho = 0.1</math></b>                                         | <b>0.633</b><br><b>(0.619 – 0.648)</b> |
| Breast cancer                     | GWAS significant variants       | 572 / 577<br>(99.1%)                            | $p < 5 \times 10^{-8}$ , $r^2 < 0.2$                                   | 0.677<br>(0.667 – 0.687)               |
| <b>Breast cancer</b>              | <b>Pruning and thresholding</b> | <b>5158 / 5218</b><br><b>(98.85%)</b>           | <b><math>p &lt; 5 \times 10^{-4}</math>, <math>r^2 &lt; 0.2</math></b> | <b>0.685</b><br><b>(0.675 – 0.695)</b> |
| Breast cancer                     | LDpred                          | 7,227,160 / 7,261,712<br>(99.5%)                | $\rho = 0.1$                                                           | 0.679<br>(0.669 – 0.689)               |

**Supplementary Table 7.** Comparison of GPS<sub>CAD</sub> to two previously published polygenic scores for coronary artery disease

| High GPS definition                                 | Reference group | Odds ratio | 95% Confidence interval | P-value                |
|-----------------------------------------------------|-----------------|------------|-------------------------|------------------------|
| <b>Tada et al.<sup>1</sup> (50 variants)</b>        |                 |            |                         |                        |
| Top 20% of distribution                             | Remaining 80%   | 1.86       | 1.78 – 1.95             | $2.1 \times 10^{-143}$ |
| Top 10% of distribution                             | Remaining 90%   | 2.09       | 1.97 – 2.22             | $4.5 \times 10^{-136}$ |
| Top 5% of distribution                              | Remaining 95%   | 2.26       | 2.09 – 2.43             | $8.6 \times 10^{-100}$ |
| Top 1% of distribution                              | Remaining 99%   | 2.24       | 1.90 – 2.62             | $1.7 \times 10^{-22}$  |
| Top 0.5% of distribution                            | Remaining 99.5% | 2.31       | 1.83 – 2.88             | $3.7 \times 10^{-13}$  |
| <b>Abraham et al.<sup>2</sup> (49,310 variants)</b> |                 |            |                         |                        |
| Top 20% of distribution                             | Remaining 80%   | 1.94       | 1.85 – 2.03             | $3.2 \times 10^{-163}$ |
| Top 10% of distribution                             | Remaining 90%   | 2.07       | 1.95 – 2.19             | $4.5 \times 10^{-132}$ |
| Top 5% of distribution                              | Remaining 95%   | 2.28       | 2.12 – 2.46             | $1.8 \times 10^{-103}$ |
| Top 1% of distribution                              | Remaining 99%   | 2.71       | 2.33 – 3.14             | $2.1 \times 10^{-39}$  |
| Top 0.5% of distribution                            | Remaining 99.5% | 2.55       | 2.04 – 3.14             | $1.7 \times 10^{-17}$  |
| <b>GPS (6,630,150 variants)</b>                     |                 |            |                         |                        |
| Top 20% of distribution                             | Remaining 80%   | 2.55       | 2.43 – 2.67             | $< 1 \times 10^{-300}$ |
| Top 10% of distribution                             | Remaining 90%   | 2.89       | 2.74 – 3.05             | $< 1 \times 10^{-300}$ |
| Top 5% of distribution                              | Remaining 95%   | 3.34       | 3.12 – 3.58             | $6.5 \times 10^{-264}$ |
| Top 1% of distribution                              | Remaining 99%   | 4.83       | 4.25 – 5.46             | $1.0 \times 10^{-132}$ |
| Top 0.5% of distribution                            | Remaining 99.5% | 5.17       | 4.34 – 6.12             | $7.9 \times 10^{-78}$  |

GPS – genome-wide polygenic score

50 of 50 (100%) of the variants included in the Tada et al. score were available in the UK Biobank validation dataset. 49,297 of 49,310 (99.97%) of the variants included in the Abraham et al. score were available in the UK Biobank validation dataset. 6,630,100 / 6,630,150 (>99.9%) of the variants included in the GPS were available in the UK Biobank validation dataset. Odds ratios calculated by comparing those with high GPS to the remainder of the population in a logistic regression model adjusted for age, sex, genotyping array, and the first four principal components of ancestry.

**Supplementary Table 8.** Baseline characteristics according to high genome-wide polygenic score for coronary artery disease

Baseline characteristics according to high coronary artery disease polygenic score status, defined as the top 8% of the distribution empirically shown to be at  $\geq 3$ -fold risk of CAD. Values displayed are mean (standard deviation) for continuous variables and N (%) for categorical variables.

GPS<sub>CAD</sub> – genome-wide polygenic score for coronary artery disease

|                                    | <b>Remainder of population</b> | <b>Top 8% of GPS<sub>CAD</sub> distribution</b> | <b>P-value</b> |
|------------------------------------|--------------------------------|-------------------------------------------------|----------------|
| Number of individuals              | 265,859                        | 23,119                                          |                |
| Coronary artery disease            | 7,061 (2.7%)                   | 1,615 (7.0%)                                    | < 0.001        |
| Age, years                         | 56.9 (8.0)                     | 56.7 (8.1)                                      | < 0.001        |
| Male sex                           | 120,673 (45%)                  | 10,410 (45%)                                    | 0.29           |
| Hypertension                       | 73,982 (28%)                   | 7,477 (32%)                                     | < 0.001        |
| Type 2 diabetes                    | 5,240 (2.0%)                   | 613 (2.7%)                                      | < 0.001        |
| Hypercholesterolemia               | 35,042 (13%)                   | 4,559 (20%)                                     | < 0.001        |
| Current smoking                    | 24,399 (9.2%)                  | 2,200 (9.5%)                                    | 0.09           |
| Family history of heart disease    | 94,117 (35%)                   | 10,101 (44%)                                    | < 0.001        |
| Body mass index, kg/m <sup>2</sup> | 27.3 (4.7)                     | 27.6 (4.8)                                      | < 0.001        |
| Lipid-lowering therapy             | 43,923 (17%)                   | 5,589 (24%)                                     | < 0.001        |



**Supplementary Table 9.** Assessment of genome-wide polygenic scores in the testing dataset.

| <b>Disease</b>             | <b>N variants available / N variants in score (%)</b> | <b>Proportion of variance explained (%)</b> |
|----------------------------|-------------------------------------------------------|---------------------------------------------|
| Coronary artery disease    | 6,630,100 / 6,630,150<br>(> 99.9%)                    | 4.0%                                        |
| Atrial fibrillation        | 6,722,280 / 6,730,541<br>(99.9%)                      | 2.9%                                        |
| Type 2 diabetes            | 6,909,367 / 6,917,436<br>(99.9%)                      | 2.9%                                        |
| Inflammatory bowel disease | 6,899,007/6,907,112<br>(99.9%)                        | 2.1%                                        |
| Breast cancer              | 5,186 / 5,218<br>(99.4%)                              | 2.7%                                        |

Proportion of variance explained was calculated for each disease using the Nagelkerke's pseudo- $R^2$  metric. The  $R^2$  was calculated for the full model inclusive of the genome-wide polygenic score plus the covariates minus  $R^2$  for the covariates alone, thus yielding an estimate of the explained variance attributable to the polygenic score. Covariates in the model included age, gender, genotyping array, and the first four principal components of ancestry.

**Supplementary Table 10.** Prevalence and clinical impact of a high genome-wide polygenic score in unrelated individuals

| High GPS definition        | Reference group | Odds ratio | 95% Confidence interval | P-value                |
|----------------------------|-----------------|------------|-------------------------|------------------------|
| Coronary artery disease    |                 |            |                         |                        |
| Top 20% of distribution    | Remaining 80%   | 2.53       | 2.42 – 2.66             | $< 1 \times 10^{-300}$ |
| Top 10% of distribution    | Remaining 90%   | 2.90       | 2.74 – 3.07             | $< 1 \times 10^{-300}$ |
| Top 5% of distribution     | Remaining 95%   | 3.34       | 3.11 – 3.58             | $1.6 \times 10^{-244}$ |
| Top 1% of distribution     | Remaining 99%   | 4.53       | 3.95 – 5.17             | $5.2 \times 10^{-108}$ |
| Top 0.5% of distribution   | Remaining 99.5% | 5.18       | 4.31 – 6.20             | $1.6 \times 10^{-70}$  |
| Atrial fibrillation        |                 |            |                         |                        |
| Top 20% of distribution    | Remaining 80%   | 2.47       | 2.31 – 2.65             | $6.7 \times 10^{-150}$ |
| Top 10% of distribution    | Remaining 90%   | 2.74       | 2.52 – 2.96             | $7.2 \times 10^{-136}$ |
| Top 5% of distribution     | Remaining 95%   | 3.17       | 2.87 – 3.49             | $5.4 \times 10^{-119}$ |
| Top 1% of distribution     | Remaining 99%   | 4.42       | 3.78 – 5.36             | $1.4 \times 10^{-64}$  |
| Top 0.5% of distribution   | Remaining 99.5% | 5.27       | 4.15 – 6.60             | $4.4 \times 10^{-45}$  |
| Type 2 diabetes            |                 |            |                         |                        |
| Top 20% of distribution    | Remaining 80%   | 2.37       | 2.23 – 2.52             | $4.2 \times 10^{-168}$ |
| Top 10% of distribution    | Remaining 90%   | 2.52       | 2.35 – 2.71             | $2.3 \times 10^{-138}$ |
| Top 5% of distribution     | Remaining 95%   | 2.77       | 2.53 – 3.03             | $1.5 \times 10^{-106}$ |
| Top 1% of distribution     | Remaining 99%   | 3.36       | 2.81 – 3.99             | $1.8 \times 10^{-41}$  |
| Top 0.5% of distribution   | Remaining 99.5% | 3.42       | 2.67 – 4.33             | $2.5 \times 10^{-23}$  |
| Inflammatory bowel disease |                 |            |                         |                        |
| Top 20% of distribution    | Remaining 80%   | 2.19       | 2.01 – 2.38             | $9.1 \times 10^{-73}$  |
| Top 10% of distribution    | Remaining 90%   | 2.51       | 2.27 – 2.77             | $4.1 \times 10^{-74}$  |
| Top 5% of distribution     | Remaining 95%   | 2.75       | 2.42 – 3.10             | $1.9 \times 10^{-57}$  |
| Top 1% of distribution     | Remaining 99%   | 3.72       | 2.96 – 4.62             | $8.4 \times 10^{-31}$  |
| Top 0.5% of distribution   | Remaining 99.5% | 4.47       | 3.31 – 5.89             | $1.4 \times 10^{-24}$  |
| Breast cancer              |                 |            |                         |                        |
| Top 20% of distribution    | Remaining 80%   | 2.08       | 1.96 – 2.21             | $3.2 \times 10^{-122}$ |
| Top 10% of distribution    | Remaining 90%   | 2.36       | 2.20 – 2.54             | $6.8 \times 10^{-118}$ |
| Top 5% of distribution     | Remaining 95%   | 2.59       | 2.36 – 2.84             | $1.5 \times 10^{-89}$  |
| Top 1% of distribution     | Remaining 99%   | 3.47       | 2.91 – 4.12             | $4.4 \times 10^{-45}$  |
| Top 0.5% of distribution   | Remaining 99.5% | 3.78       | 2.97 – 4.75             | $9.7 \times 10^{-29}$  |

GPS – genome-wide polygenic score

A sensitivity analysis was performed in 222,529 of 288,978 (77%) of the validation cohort after excluding one of each pair of related individuals (third-degree or closer). Odds ratios calculated by comparing those with high GPS to the remainder of the population in a logistic regression model adjusted for age, sex, genotyping array, and the first four principal components of ancestry. Breast cancer analysis was restricted to female participants.
